# Supplementary material
Source: Royal Society of Chemistry journal article supplement (doi:10.1039/d6tc01008c)
Supplement: d6tc01008c1.pdf [file d6tc01008c1.pdf]

## Supporting Information

### **Hydrated Zirconium Coordination Enhanced the Photoluminescence**

### **Performance in 0D Cadmium Manganese Based Perovskites**

Panheng Wang,<sup>a</sup> Xiaoming Zhang,<sup>a</sup> Qinglin Meng,<sup>a</sup> Mosheng Cai,<sup>a</sup> Ziqiao Wu,<sup>b</sup> Chengjing Huang,<sup>a</sup>

Jiandong Fan,<sup>a,b,c,\*</sup> Wenzhe Li<sup>a,b,c,\*</sup>

<sup>a</sup> Institute of New Energy Technology, Jinan University, Guangzhou 510632, China

<sup>b</sup> Institute of New Energy Technology, College of Physics & Optoelectronic Engineering, Jinan University, Guangzhou, 510632, China.

<sup>c</sup> Guangdong Provincial Key Laboratory of Nanophotonic Manipulation, Jinan University, Guangzhou 511443, China.

E-mail: (Jiandong Fan) [jdfan@jnu.edu.cn](mailto:jdfan@jnu.edu.cn); (Wenzhe Li) [li\\_wz16@jnu.edu.cn](mailto:li_wz16@jnu.edu.cn).

**Table S1.** Crystallographic data and structure refinement details for  $[\text{ZrO}(\text{H}_2\text{O})_2]\text{Cl}_2 \cdot x\text{H}_2\text{O}$  (Zr),  $[\text{ZrO}(\text{H}_2\text{O})_8]_2\text{CdCl}_6$  (Cd),  $[\text{ZrO}(\text{H}_2\text{O})_8]_2\text{MnCl}_6$  (Mn), and  $[\text{ZrO}(\text{H}_2\text{O})_8]_2\text{Cd}_{0.7}\text{Mn}_{0.3}\text{Cl}_6$  (CdMn).

| Crystal                              | Zr                            | Cd                            | Mn                           | CdMn                         |
|--------------------------------------|-------------------------------|-------------------------------|------------------------------|------------------------------|
| CCDC No.                             | 2553895                       | 2526960                       | 2526961                      | 2526962                      |
| Measurement temperature (K)          | 293(2)                        |                               |                              |                              |
| Crystal system                       | tetragonal                    | triclinic                     |                              |                              |
| Space group name                     | P-4 21c                       | P-1                           |                              |                              |
| Lattice parameters                   | $a = 17.0492(4) \text{ \AA}$  | $a = 7.8062(2) \text{ \AA}$   | $a = 7.7794(2) \text{ \AA}$  | $a = 7.7950(2) \text{ \AA}$  |
|                                      | $b = 17.0492(16) \text{ \AA}$ | $b = 8.83610(16) \text{ \AA}$ | $b = 8.7334(2) \text{ \AA}$  | $b = 8.8048(2) \text{ \AA}$  |
|                                      | $c = 7.6920(3) \text{ \AA}$   | $c = 10.5429(3) \text{ \AA}$  | $c = 10.5215(2) \text{ \AA}$ | $c = 10.5327(3) \text{ \AA}$ |
|                                      | $\alpha = 90^\circ$           | $\alpha = 75.6310(19)^\circ$  | $\alpha = 75.951(2)^\circ$   | $\alpha = 75.711(2)^\circ$   |
|                                      | $\beta = 90^\circ$            | $\beta = 73.694(3)^\circ$     | $\beta = 74.131(2)^\circ$    | $\beta = 73.841(2)^\circ$    |
|                                      | $\gamma = 90^\circ$           | $\gamma = 85.147(2)^\circ$    | $\gamma = 85.376(2)^\circ$   | $\gamma = 85.243(2)^\circ$   |
| Unit-cell volume                     | $2235.87 \text{ \AA}^3$       | $676.04(3) \text{ \AA}^3$     | $666.95(3) \text{ \AA}^3$    | $672.78(3) \text{ \AA}^3$    |
| Z                                    | 2                             | 1                             | 1                            | 1                            |
| Final R indexes                      | R1= 0.0537                    | R1= 0.0288                    | R1= 0.0333                   | R1= 0.0352                   |
| [All data]                           | $wR^2 = 0.1470$               | $wR^2 = 0.0651$               | $wR^2 = 0.0763$              | $wR^2 = 0.0844$              |
| Goodness-of-fit<br>On F <sup>2</sup> | 1.062                         | 1.065                         | 1.049                        | 1.046                        |

**Table S2.** Zr-O bond lengths in  $[\text{ZrO}(\text{H}_2\text{O})_8]_2\text{CdCl}_6$ .

| O atom           | Zr1-O (Å) | Zr2-O (Å) |
|------------------|-----------|-----------|
| O1 ( $\mu_2$ -O) | 2.10072   | 2.16405   |
| O2 ( $\mu_2$ -O) | 2.16405   | 2.10072   |
| O3               | 2.25353   |           |
| O4               |           | 2.25353   |
| O5               | 2.23640   |           |
| O6               |           | 2.23640   |
| O7               | 2.24542   |           |
| O8               |           | 2.24542   |
| O9               | 2.19146   |           |
| O10              |           | 2.19146   |
| O11              | 2.16314   |           |
| O12              |           | 2.16314   |
| O13              | 2.17340   |           |
| O14              |           | 2.17340   |

**Table S3.** Elemental concentrations and calculated Cd/Mn molar composition of CdMn ( $[\text{ZrO}(\text{H}_2\text{O})_8]_2\text{Cd}_x\text{Mn}_{1-x}\text{Cl}_6$ ) crystals.

| Sample                                                                      | Cd (ppm) | Mn (ppm) | Calculated Cd:Mn molar ratio | Normalized composition           |
|-----------------------------------------------------------------------------|----------|----------|------------------------------|----------------------------------|
| $[\text{ZrO}(\text{H}_2\text{O})_8]_2\text{Cd}_x\text{Mn}_{1-x}\text{Cl}_6$ | 9.562    | 1.983    | 0.702:0.298                  | $\text{Cd}_{0.7}\text{Mn}_{0.3}$ |

**Table S4.** Selected bond lengths (Å) and bond angles (°) for the [BCl<sub>6</sub>]<sup>4+</sup> (B = Cd/Mn) octahedra in [ZrO(H<sub>2</sub>O)<sub>8</sub>]<sub>2</sub>CdCl<sub>6</sub> (Cd), [ZrO(H<sub>2</sub>O)<sub>8</sub>]<sub>2</sub>MnCl<sub>6</sub> (Mn), and [ZrO(H<sub>2</sub>O)<sub>8</sub>]<sub>2</sub>Cd<sub>0.7</sub>Mn<sub>0.3</sub>Cl<sub>6</sub> (CdMn). Symmetry codes are given where applicable.

| Bond              | Angle (°)   |            |            |
|-------------------|-------------|------------|------------|
|                   | Cd          | Mn         | CdMn       |
| Cl(1)-B-Cl(2)     | 87.79(3)    | 88.17(3)   | 92.10(4)   |
| Cl(1)-B-Cl(2)#1   | 87.69(4)    | 88.26(4)   | 92.14(4)   |
| Cl(1)-B-Cl(2)#2   | 92.31(4)    | 91.74(4)   | 87.86(4)   |
| Cl(1)-B-Cl(2)#3   | 92.21(3)    | 91.83(3)   | 87.90(4)   |
| Cl(2)-B-Cl(2)#1   | 91.36(4)    | 90.95(4)   | 88.76(4)   |
| Cl(2)#1-B-Cl(2)#2 | 88.64(4)    | 89.05(4)   | 91.24(4)   |
| Cl(2)#2-B-Cl(2)#3 | 91.36(4)    | 90.95(4)   | 88.76(4)   |
| Cl(2)#3-B-Cl(2)   | 88.64(4)    | 89.05(4)   | 91.24(4)   |
| Cl(1)#1-B-Cl(2)   | 87.79(3)    | 88.17(3)   | 92.10(4)   |
| Cl(1)#1-B-Cl(2)#1 | 87.69(4)    | 88.26(4)   | 92.14(4)   |
| Cl(1)#1-B-Cl(2)#2 | 92.21(3)    | 91.83(3)   | 87.90(4)   |
| Cl(1)#1-B-Cl(2)#3 | 92.31(4)    | 91.74(4)   | 87.86(4)   |
| Bond              | Lengths (Å) |            |            |
|                   | Cd          | Mn         | CdMn       |
| Cl(1)-B           | 2.5796(9)   | 2.5955(9)  | 2.5578(10) |
| Cl(1)#1-B         | 2.5796(9)   | 2.5955(9)  | 2.5578(10) |
| Cl(2)-B           | 2.6715(9)   | 2.5504(11) | 2.6489(11) |
| Cl(2)#3-B         | 2.6715(9)   | 2.5504(11) | 2.6489(11) |
| Cl(2)#1-B         | 2.6289(11)  | 2.5027(9)  | 2.6037(13) |
| Cl(2)#2-B         | 2.6289(11)  | 2.5027(9)  | 2.6037(13) |

**Table S5.** ICP analysis of Cd crystals

| Sample                                                               | Product  |          |
|----------------------------------------------------------------------|----------|----------|
|                                                                      | Cd (ppm) | Mn (ppm) |
| [ZrO(H <sub>2</sub> O) <sub>8</sub> ] <sub>2</sub> CdCl <sub>6</sub> | 5.364    | 0.024    |

**Table S6.** Bi-exponential fitting parameters and derived lifetimes from TRPL.

Model:  $I(t) = A_1 e^{-t/\tau_1} + A_2 e^{-t/\tau_2} + y_0$ .

Average lifetime:  $\langle \tau \rangle = \frac{A_1 \tau_1 + A_2 \tau_2}{A_1 + A_2}$ .

TRPL monitored at **620 nm** (units: ms)

| Crystal | A <sub>1</sub>    | τ <sub>1</sub> (ms) | A <sub>2</sub>    | τ <sub>2</sub> (ms) | τ (ms)      |
|---------|-------------------|---------------------|-------------------|---------------------|-------------|
| Cd      | 0.58928 ± 0.04200 | 0.24161 ± 0.03500   | 0.33091 ± 0.02200 | 3.89317 ± 0.33300   | 1.55 ± 0.15 |
| Mn      | 0.20866 ± 0.00519 | 0.60055 ± 0.02427   | 0.78740 ± 0.00526 | 3.26153 ± 0.01750   | 2.70 ± 0.02 |
| CdMn    | 0.10236 ± 0.00409 | 0.58453 ± 0.04156   | 0.88338 ± 0.00395 | 3.64370 ± 0.01434   | 3.33 ± 0.02 |

**Table S7.** Bi-exponential fitting parameters and derived lifetimes from TRPL.

Model:  $I(t) = A_1 e^{-t/\tau_1} + A_2 e^{-t/\tau_2} + y_0$ .

Average lifetime:  $\langle \tau \rangle = \frac{A_1 \tau_1 + A_2 \tau_2}{A_1 + A_2}$ .

TRPL monitored at **445 nm** (units: ns)

| Crystal | A <sub>1</sub>    | τ <sub>1</sub> (ns) | A <sub>2</sub>    | τ <sub>2</sub> (ns) | τ(ns)       |
|---------|-------------------|---------------------|-------------------|---------------------|-------------|
| Cd      | 0.93924 ± 0.00900 | 0.78791 ± 0.01280   | 0.13740 ± 0.00900 | 4.53447 ± 0.25890   | 1.27 ± 0.04 |
| Mn      | 0.91538 ± 0.00920 | 0.76369 ± 0.01490   | 0.17122 ± 0.00790 | 5.85345 ± 0.29730   | 1.57 ± 0.06 |
| CdMn    | 0.84045 ± 0.00810 | 0.74702 ± 0.01320   | 0.21813 ± 0.00770 | 4.86846 ± 0.16380   | 1.60 ± 0.04 |

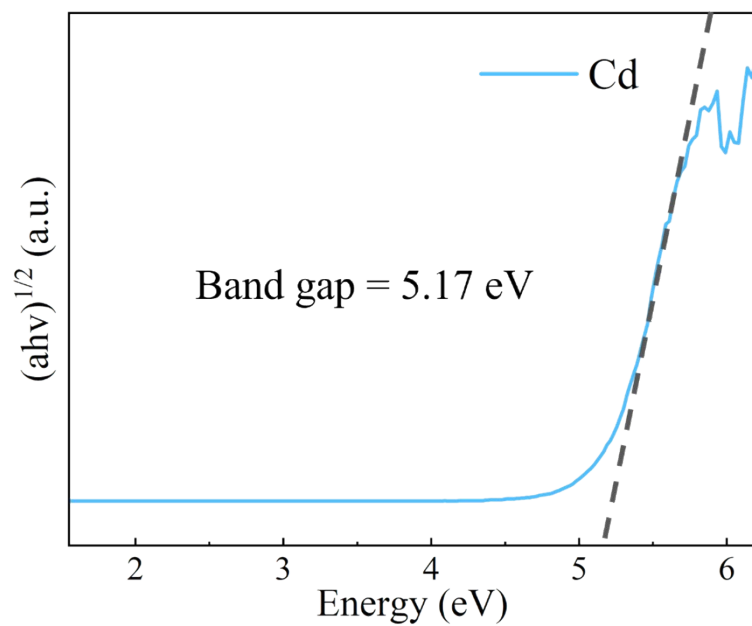

**Fig. S1.** Corresponding Tauc plot of Cd.

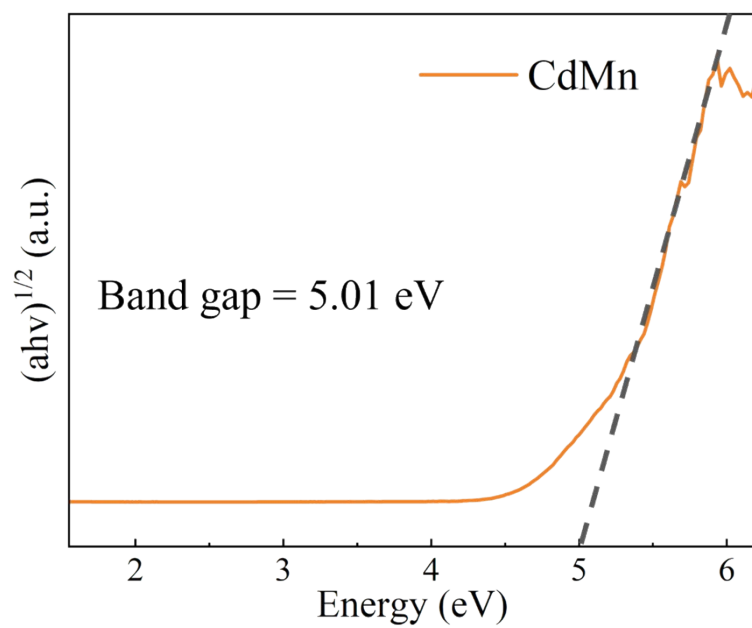

**Fig. S2.** Corresponding Tauc plot of CdMn.

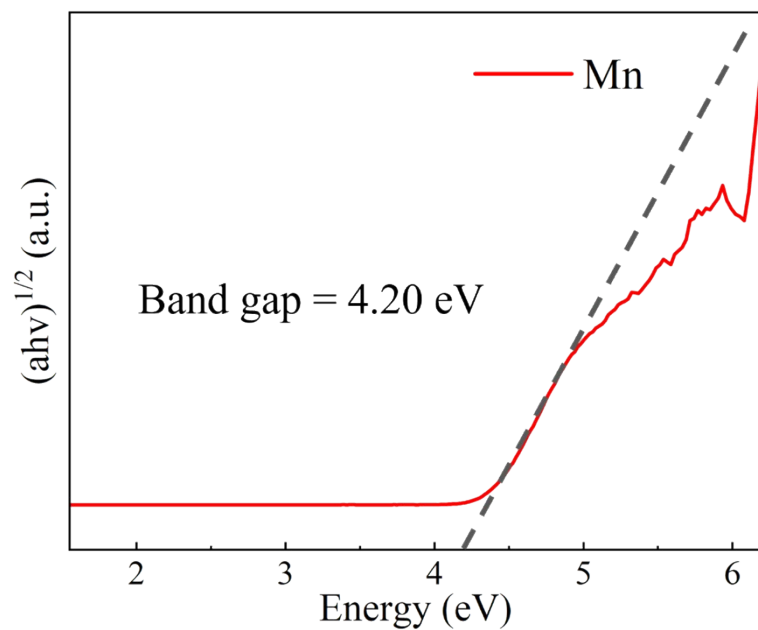

**Fig. S3.** Corresponding Tauc plot of Mn.

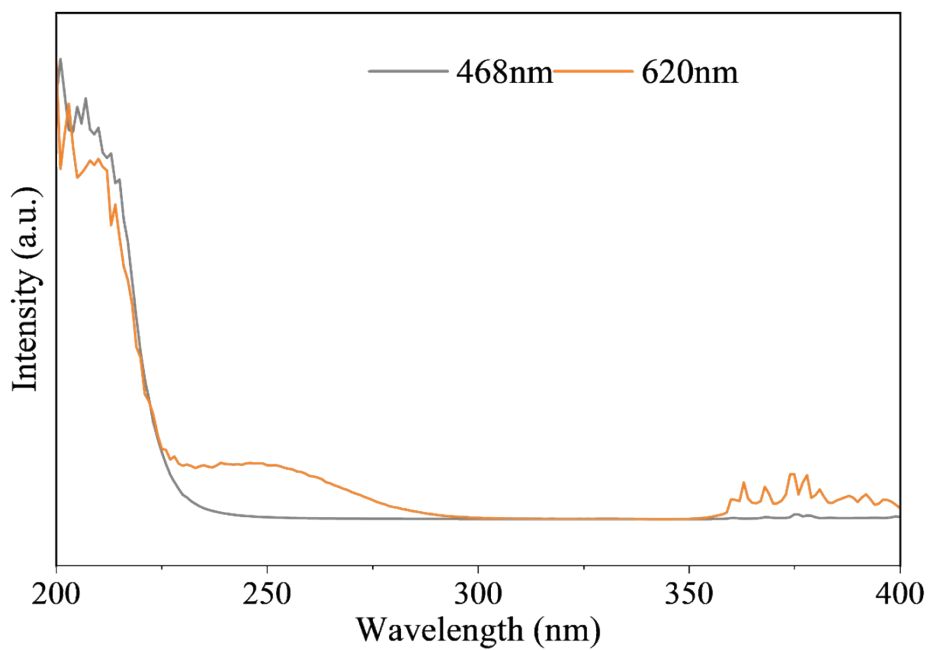

**Fig. S4.** PLE spectra of CdMn monitored at 468 and 620 nm (200-400 nm).

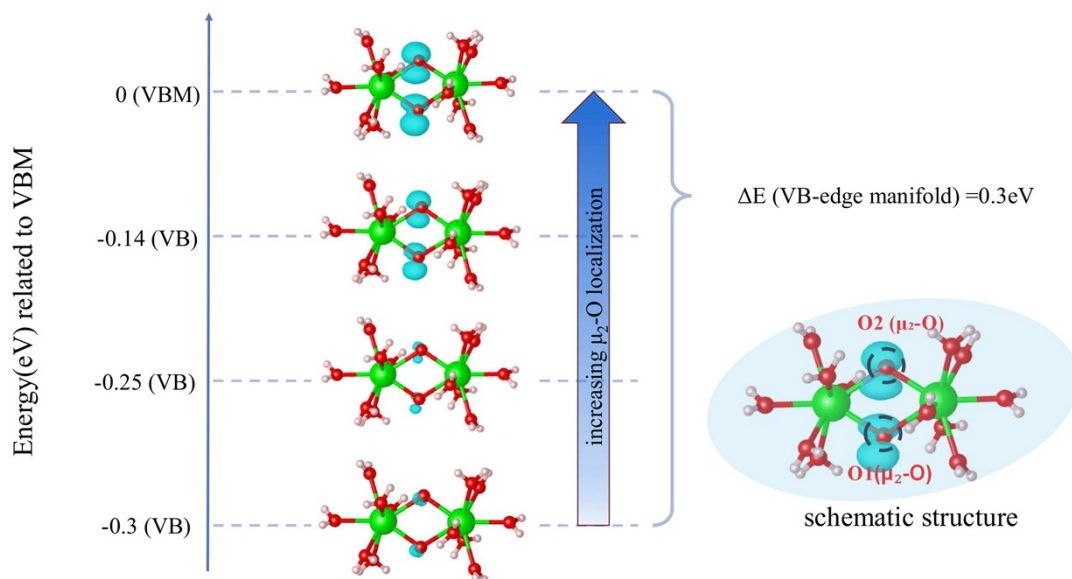

**Fig. S5.** Band-decomposed hole-density isosurfaces for VBM and VB (energies relative to VBM), plotted at the same isovalue ( $\rho = 6 \times 10^{-7}$ ; units as in the charge-density file).

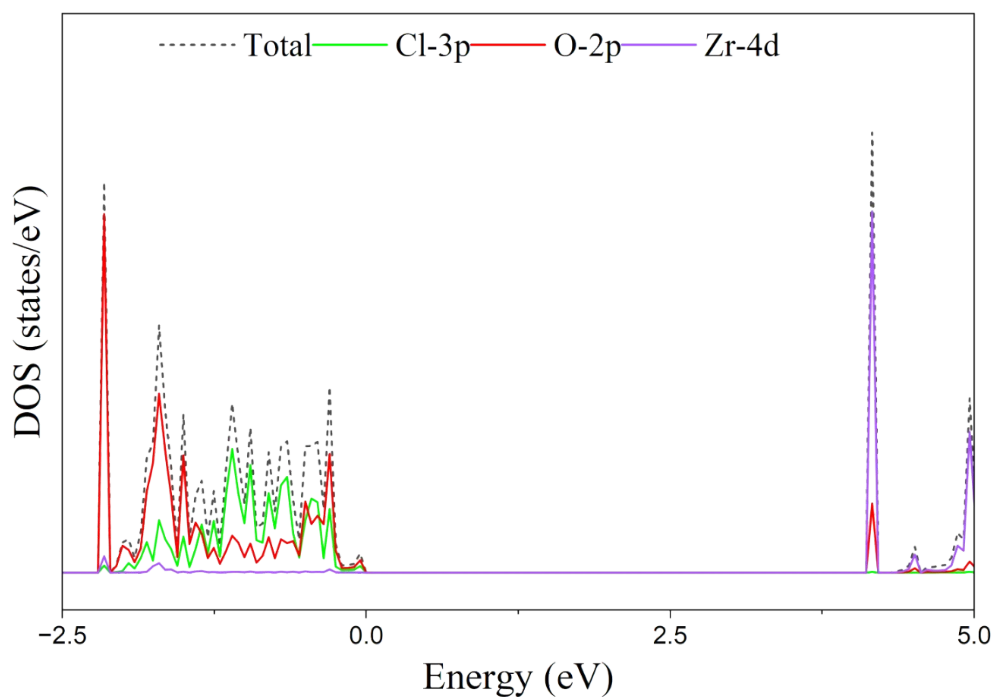

**Fig. S6.** Corresponding total and projected density of states (DOS) for  $[\text{ZrO}(\text{H}_2\text{O})_2]\text{Cl}_2 \cdot x\text{H}_2\text{O}$ .
